# Supplementary material for: Diversity and Evolution of Viral Pathogen Community in Cave Nectar Bats (Eonycteris spelaea)
Source: MDPI journal article supplement (doi:10.3390/v11030250), 2019-03-12
Supplement: s1 [file s1]

## Picornavirus (polyprotein)

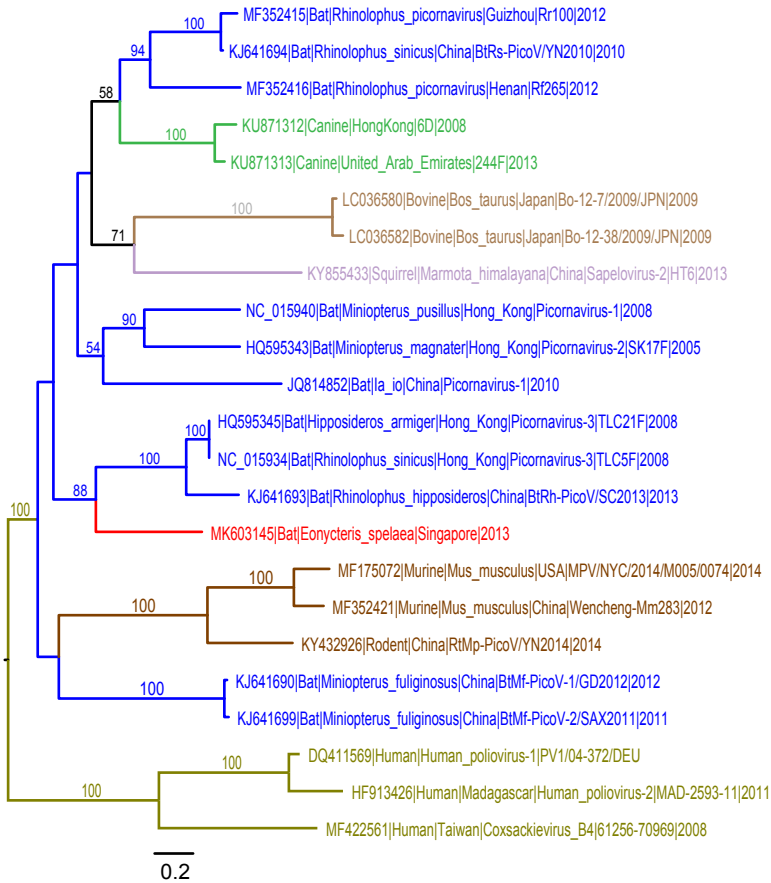

## Picornavirus (3D)

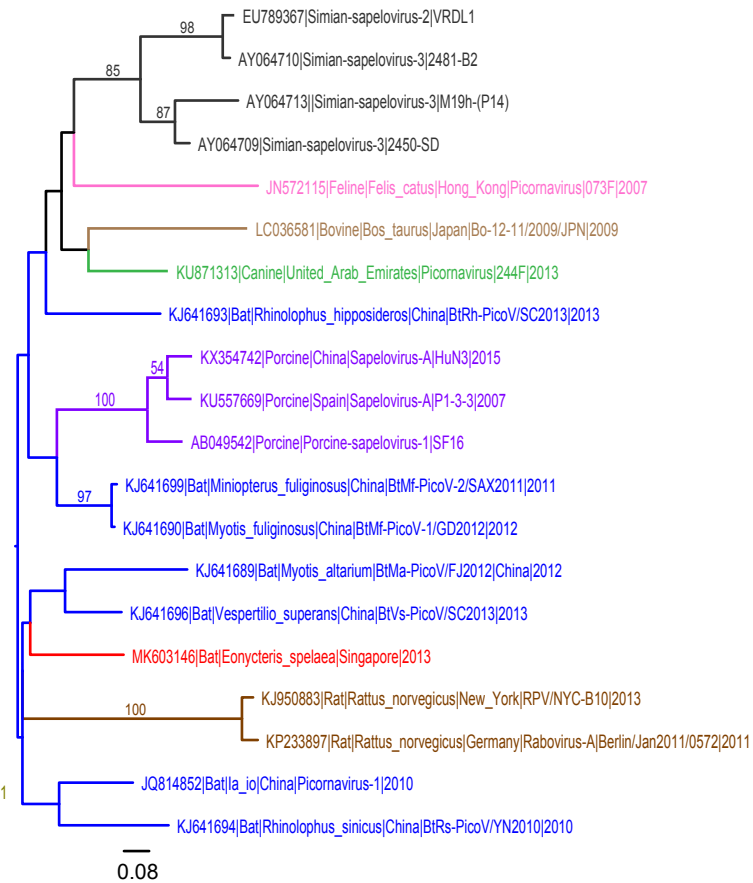

Host

- Bat
- Canine
- Human
- Rodent
- Bovine
- Feline
- Porcine
- Squirrel
