# Supplementary material for: Diversity and Evolution of Viral Pathogen Community in Cave Nectar Bats (Eonycteris spelaea)
Source: MDPI journal article supplement (doi:10.3390/v11030250), 2019-03-12
Supplement: s1 [file s1]

# Adenovirus (V4)

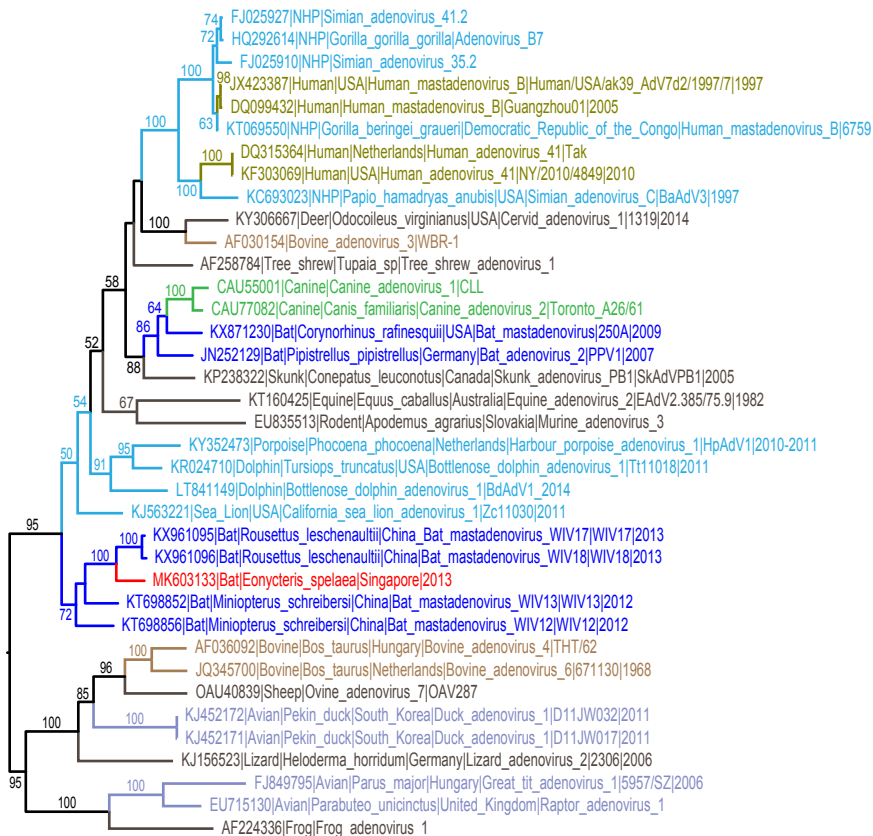

0.2

Host

- Aquatic mammals
- Bat
- Canine
- Non-human primate
- Avian
- Bovine
- Human
- Other mammals
