# Supplementary figures and images for: Diversity and Evolution of Viral Pathogen Community in Cave Nectar Bats (Eonycteris spelaea)
Source: MDPI journal article supplement (doi:10.3390/v11030250), 2019-03-12

# Polyomavirus (VP2)

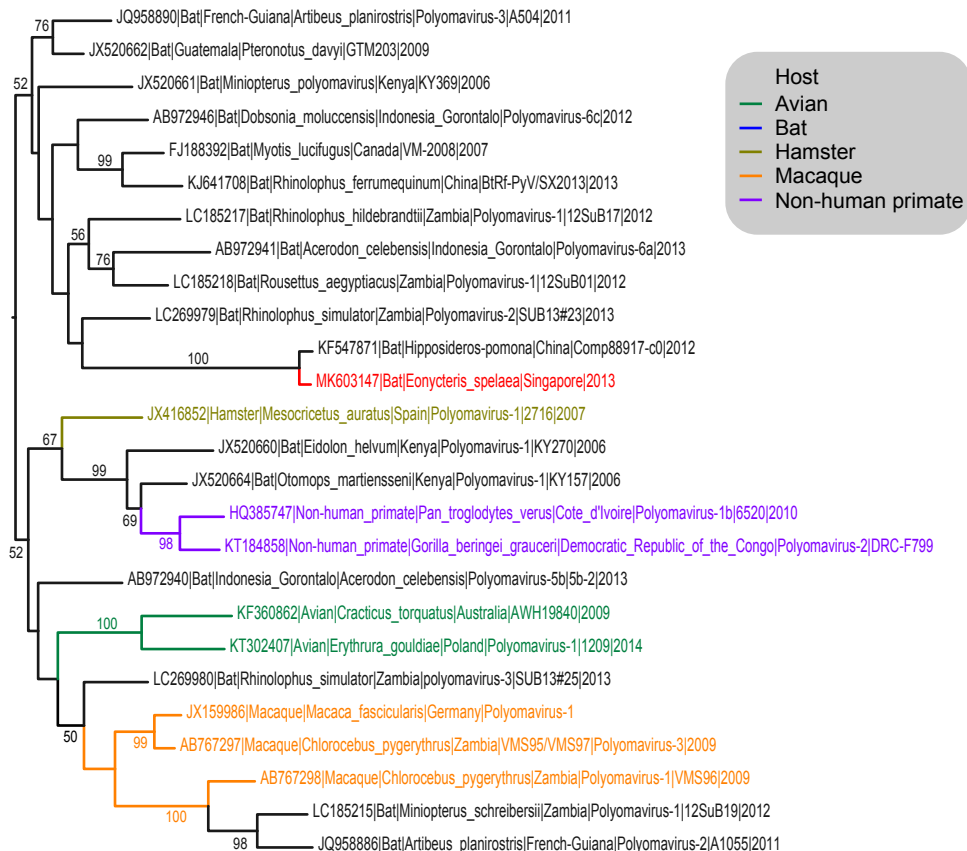

0.2

Supplement: s1 [file s1]

# Papillomavirus (E1)

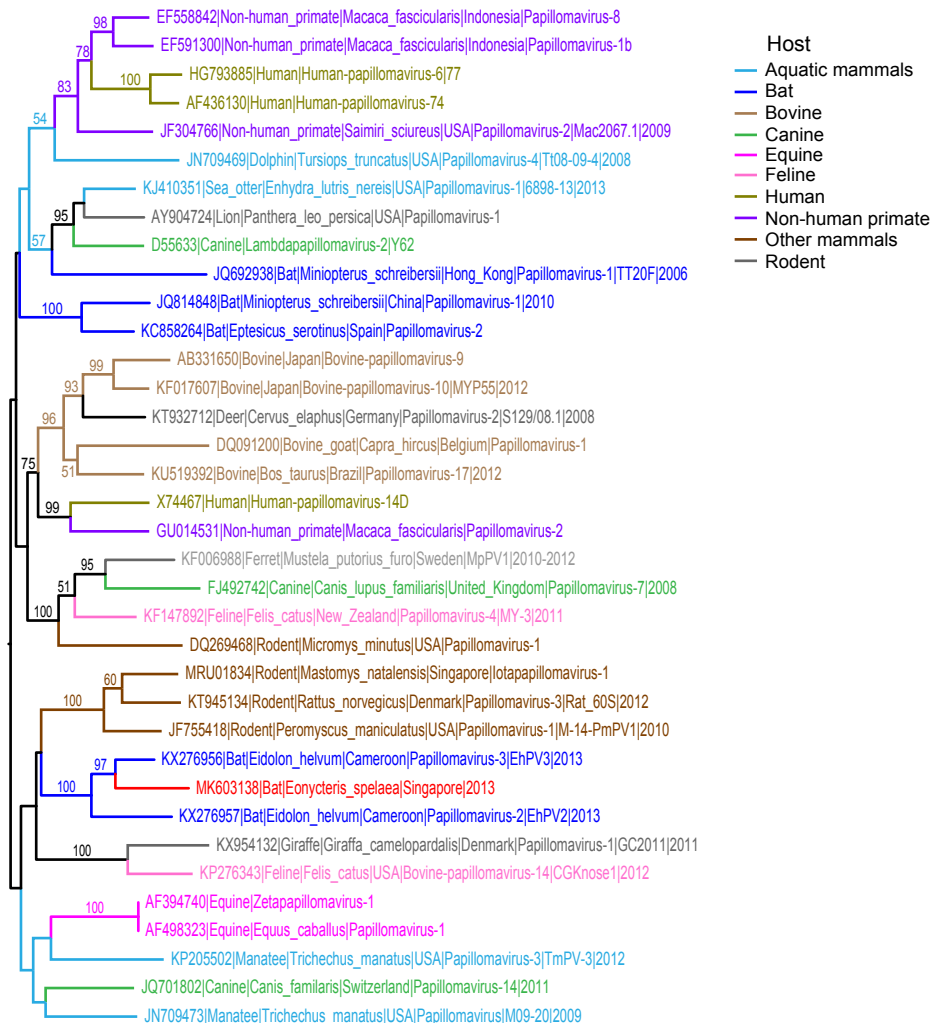

Supplement: s1 [file s1]

## Flavivirus (E)

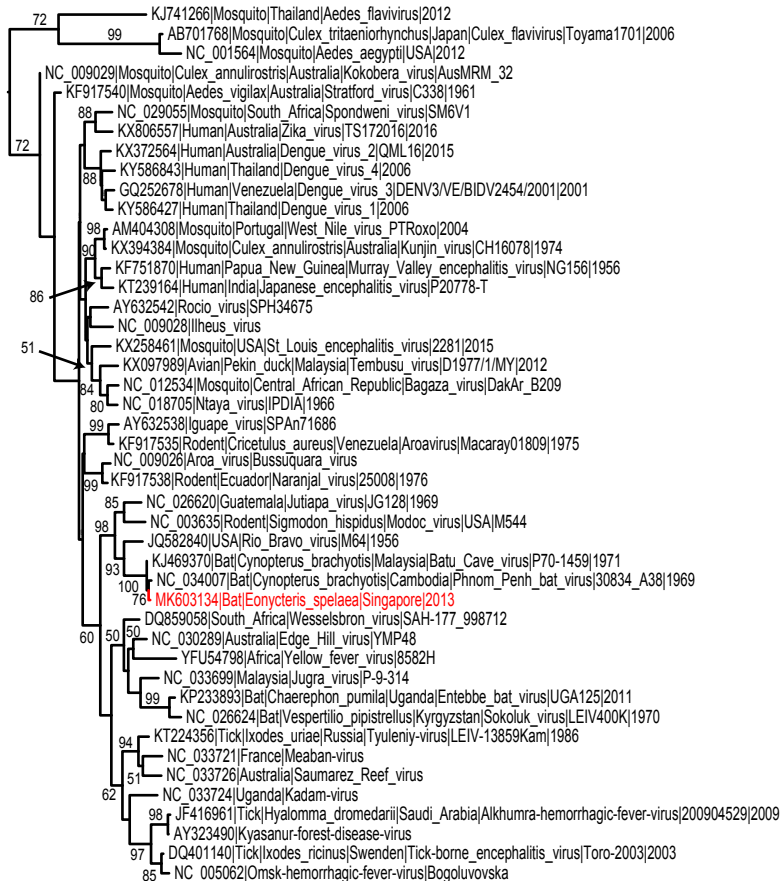

0.5

## Flavivirus (NS5)

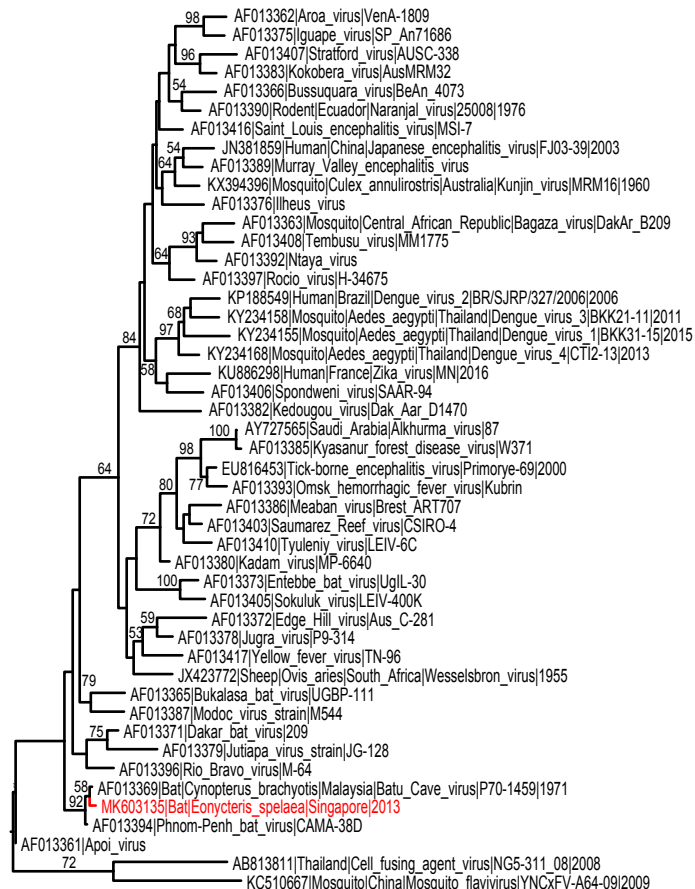

0.3

Supplement: s1 [file s1]
